# Supplementary material for: A standard to report biological variation data studies – based on an expert opinion
Source: publisher site journal article supplement (doi:10.1515/cclm-2024-0489), 2024-07-05

# Supplemental Materials

# **A standard to report biological variation data studies - based on an expert opinion.**

**Table S1.** High level reporting checklist for assessing STARBIV compliance mapped to the domains of a minimum data set described in Table 1 of the main text.

To be used in conjunction with the mind map hosted on the EFLM Biological Variation Database website (<https://biologicalvariation.eu/Publication_Structure_V2_0.html>)

| **Topics** | **Topic**  *(MDS Domain Mapping: A-F)a* | **Topic Content**  Detailed guidance with links accessing information, and key references can be found in the Mind map published online at:  <https://biologicalvariation.eu/Publication_Structure_V2_0.html> | **Evidenced in manuscript/publication.**  **Indicate yes or no. If no provide reason and mitigation** |
| --- | --- | --- | --- |
| **Title/ Abstract /keywords** | 1 | The title should indicate that the content relates to a study of biological variation, the subject of the study, the sample matrix, and the population studied. |  |
| **Abstract** | 1.1 | As a minimum it should contain the headline biological variation data, the major characteristics of the population studied (numbers of subjects with demographics), clearly identify the analyte and measurand/s studied (the analyte quantities studied in a particular sample matrix, (e.g. concentration of glucose in plasma), the statistical approach taken, the duration of the study and the geographical location of the study. |  |
| **Introduction** | 2 | Introduction should clearly identify the context and aims of the study and cite any previous relevant studies of biological variability of the target analyte. Recommended terminology to be adopted re description of variability. |  |
| **Methods** | 3 | Described in enough detail to assess transportability of the derived data across populations and health care systems. The biological variation data produced are effectively reference data and their applicability requires delivery of appropriately described metadata to enable their use as such.  Expected detail. Analyte (component being measured), the measurand/s (the quantity or quantities to be measured, see section 1.1), and state of well-being of the subjects under study should be clearly and unambiguously identified. *Relevant coding systems might be employed, (e.g.* LOINC,SNOMED, C-NPU) |  |
| Analyte/ Measurand. | 3.1 (A) | The described study should clearly identify the target analyte and measurand/s. Where available internationally agreed terminology and coding should be utilised. |  |
| Subjects | 3.2 (B) | The description of the subjects and population studied should be detailed enough to enable transportability of the biological variation data. Minimum data set should be present, which should include number of subjects studied, age, gender, and state of well-being. |  |
| Measurement Procedure. | 3.3 (A) | A clear description of the analytical methodology used should form part of the metadata. This may be made available *via* an appropriate reference (in the case of kits to the manufactures information for users documentation may be referenced including version number and data of publication if available) or be presented within the publication. Deviation from standard operating procedures, use of adaptations of published methods, and deviation from manufacturers recommended methods in the case of commercially available systems should be documented. Standardisation and traceability should be clearly identified. |  |
| Length of Study | 3.4 (C) | Length of the study periods should be clearly identified. |  |
| Sampling | 3.5 (C) | Sampling protocols (e.g. subject preparation, sampling conditions) that minimise pre-analytical variation should be adequately described to enable transportability of the data. Numbers of samples taken should be sufficient to deliver the required power to the study |  |
| Samples | 3.6 (C) | Recorded details should include the beginning and end date of the study and timings of sampling.    Sampe type should be described in detail. Storage conditions of samples prior to analysis should be described. |  |
| Conditions for analysis of samples | 3.7 (C) | A description of conditions under which the samples were analysed. Analytical protocols should be designed to minimise sources of analytical variation (Optimal Conditions Precision). |  |
| **Data Analysis** | 4 | Data analysis techniques should be described. The power of the study to identify indices of biological variation should be calculated and presentedb. If data are partitioned *(e.g.by*  age , sex or other) Section4 including 4.1 and 4.2 should applied and reported for each partitioned data set. |  |
| Outlier analysis | 4.1 (C) | Clinical data collected during the study should be assessed. Test for outliers should be applied to all levels of data (between replicate analysis, between samples within subject, between subjects). Outlier should be excluded from the final analysis of the data. The numbers of outliers and reasons for their exclusion must be given. |  |
| Steady State | 4.2 (C) | For the obtained estimates of CVI to be reliable, subjects must be in steady state. Evidence should therefore be presented that data from subjects to be included in the analysis to determine CVI  have been examined using trend analysis to confirm steady state and where necessary the data have been adequately transformed to account for this. |  |
| Heterogeneity of variance. | 4.3 (C) | Subjects with outlying within subject variance should be rejected from calculations used to determine an estimate of common true variance. The numbers of outliers and reasons for their exclusion must be givenb. |  |
| Statistical methods described and appropriate | 4.4 (C) | Statistical methods used should be appropriately identified, fit for purpose, and referenced. Data that do not conform to a normal distribution should be appropriately transformed. |  |
| **Results** | 5 | Unified terminology should be used, and appropriately defined metadata clearly presented to enable understanding and transportation of the data through time and across health care systems. |  |
| Terminology | 5.1 (D) | Terms and symbols used to describe biological variation should conform to standards identified by Simundic *et al.*c |  |
| Results clearly presented and managed | 5.2 (D) | Biological variation data, with derived indices, should be tabulated in a format that enables extraction of the key data unambiguously associated with a minimum data set to enable transportability of the data.  The power of the study and confidence limits around estimates of biological variation should be presented.  The results section should clearly identify the results of outlier analysis undertaken and confirm homogeneity of the data sets.  If data are stratified, the variables used to enable this should be clearly characterised. |  |
| **Discussion** | 6 | The discussion of the data should clearly include a focus on factors that impact on the transportability of the data to other settings. Limitations and strengths of the study should be addressed.  If the data are used to set analytical performance specifications, derive reference change values, and study individuality, the recommendations of Simundic *et al* should be followed.c |  |
|  |  |  |  |

a MDS domains defined as A to F as shown in Table 1.

b Tests to determine the power of a study to identify heteroscedasticity need to be applied. If variances are not homogenous derived estimates of biological variation cannot be trusted, and are not representative for the population in which it is examined.

c Simundic A-M, Kacko S, Miler M, Fraser CG, Per HP. Terms and Symbols Used in Studies on Biological Variation: The Need for Harmonization. Clin Chemistry. 2015;61(2):438–9. <https://doi.org/10.1373/clinchem.2014.233791>

**Table S2**. Potential benefits for the delivery and use of biological variation (BV) data tabulated against improvement areas; to be realised through compliance with EFLM checklists embedded within the STARBIV enabled by the use of the EFLM mind map.

| **Improvement Area** | **Benefits** |
| --- | --- |
| Quality assessment assurance of biological variation (BV) data | - Provision of a framework for the design, delivery, and reporting of new studies compliant with quality indicators (e.g. BIVAC). - Like the STARD initiative for diagnostic accuracy studies, STARBIV checklist will help to improve the quality of reporting of future BV studies delivering to users’ valid data sets accompanied by a required minimum data set. - Assures that future study reports include meta-data required to enable the use of BV data as reference data. - STARBIV enables:   - critical appraisal of historical BV data to deliver assurance that best practice has been applied retrospectively in their generation and reporting.   - ensures prospectively that future study reports meet a standard and deliver BV data that are assessable as fit for purpose and transportable. |
| Consistency and comparability | - Provision of a structured framework for reviewers and end-users of BV data to enable objective assessment of data sets based on well-documented studies performed to and compliant with a standard. - Enables producers of BV data to deliver consistent reports for publication of these reference data. <https://biologicalvariation.eu/Publication_Structure_V2_0.html> - Ensures the MDS is supplied to enable meta-analysis and combination of data sets from compatible studies to improve the confidence limits around the BV data estimates. |
| Decision-making | - Compliance with standardized reporting guidelines enables availability of well characterised BV data in a format that enables users to assess relevance of published data to their clinical practice i.e. transportability. - Compliance imbues confidence in users around the veracity of the BV data and the applications to which it is put in their clinical practice. |
| Health Informatics | - A checklist approach will assure/ensure that an agreed MDS is reported with BV data to enable automated clinical informatics applications. - BV data accompanied by key metadata set from defined domains, will enable development and compliance with health informatics standards for the transmission and integration of BV data into information and knowledge management systems. - Promotes the use of BV data as reliable reference data and supports data sharing through online databases and other media. |

**Figure S1.** Illustrative example of the granular content of the EFLM Biological variation interactive mind map *How to write a paper on biological variation* online at <https://biologicalvariation.eu/Publication_Structure_V2_0.html>


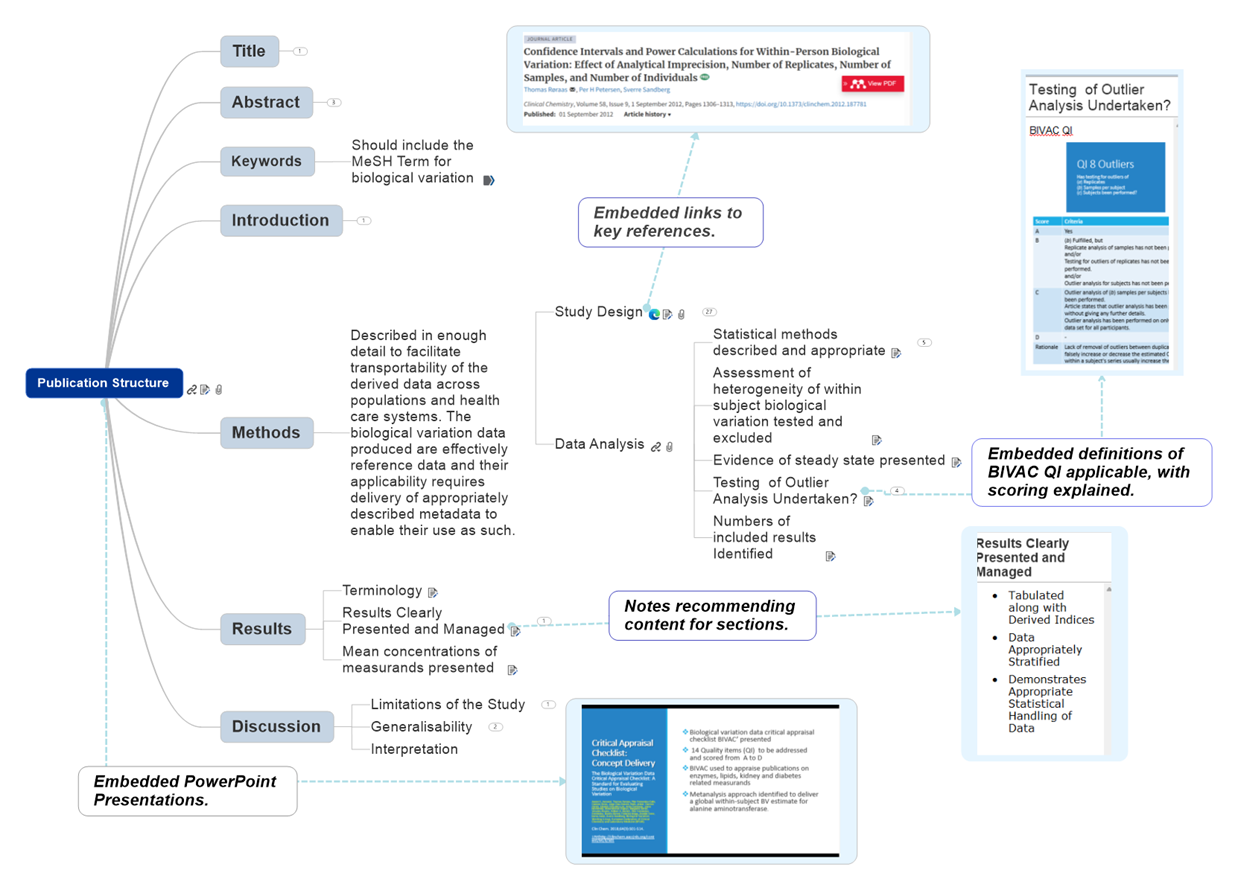

Supplement: Supplementary file 1 [file j_cclm-2024-0489_suppl_001.docx]
